# Supplementary material
Source: ML conference proceedings conference paper supplement (https://openaccess.thecvf.com/content/CVPR2026/html/Liu_D2Cache_Second-Order_Delta_CVPR_2026_paper.html)
Supplement: Supplementary file 1 [file Liu_D2Cache_Second-Order_Delta_CVPR_2026_supplemental.pdf]

# D2Cache: Second-Order Delta Caching for Higher Video Diffusion Acceleration

## Supplementary Material

### 1. Detailed Proof of Theorem 1

Here we provide the complete proof of Theorem 1 in the main paper. Let  $f(t) = \varepsilon_\theta(x_t, t)$ . For brevity, we denote  $f' = f'(t)$ ,  $f'' = f''(t)$ ,  $f''' = f'''(t)$ , and omit the  $O((\Delta t)^4)$  remainders where clear. Expanding around  $t$ :

$$f(t-1) = f(t) - f' + \frac{1}{2}f'' - \frac{1}{6}f''', \quad (1)$$

$$f(t+1) = f(t) + f' + \frac{1}{2}f'' + \frac{1}{6}f''', \quad (2)$$

$$f(t+2) = f(t) + 2f' + 2f'' + \frac{4}{3}f'''. \quad (3)$$

The first-order deltas are:

$$\begin{aligned} \delta_1(t) &= f(t) - f(t+1) \\ &= -f' - \frac{1}{2}f'' - \frac{1}{6}f''', \end{aligned} \quad (4)$$

$$\begin{aligned} \delta_1(t+1) &= f(t+1) - f(t+2) \\ &= -f' - \frac{3}{2}f'' - \frac{7}{6}f'''. \end{aligned} \quad (5)$$

The second-order delta is:

$$\delta_2(t) = \delta_1(t) - \delta_1(t+1) = f'' + f'''. \quad (6)$$

Substituting Eqs. (4) and (6) into the predictor  $\hat{f}^{(2)}(t-1) = f(t) + \delta_1(t) + \delta_2(t)$ :

$$\hat{f}^{(2)}(t-1) = f(t) - f' + \frac{1}{2}f'' + \frac{5}{6}f'''. \quad (7)$$

The error follows from Eqs. (1) and (7):

$$\begin{aligned} e_2(t) &= f(t-1) - \hat{f}^{(2)}(t-1) \\ &= -f''' + O((\Delta t)^4) = O((\Delta t)^3), \end{aligned} \quad (8)$$

improving over the first-order error  $e_1(t) = f'' + O((\Delta t)^3) = O((\Delta t)^2)$  by one order. When  $f'' \neq 0$ , we have  $\|e_2(t)\| \leq c\Delta t \|e_1(t)\|$  for some  $c > 0$ . Over  $N$  cached steps, the cumulative error reduces from  $O(N(\Delta t)^2)$  to  $O(N(\Delta t)^3)$ , explaining D2Cache’s growing advantage under higher acceleration.

### 2. More Results

**Qualitative Results on Wan2.1-14B:** To validate D2Cache’s scalability, we provide qualitative comparisons on **Wan2.1-14B** (14 billion parameters, compared to 1.3B in the main paper). Figure 2 shows generated frames under superfast acceleration ( $3.61\times$ ). TeaCache exhibits visible degradation including blurred textures and motion artifacts, while D2Cache maintains sharp details close to the default generation. This confirms that

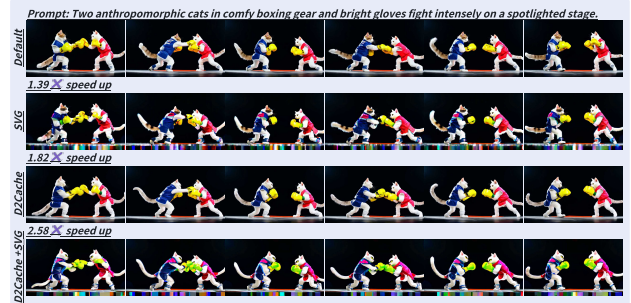

Figure 1. Qualitative results for D2Cache combined with Sparse VideoGen [1]. SVG ( $1.39\times$ ) + D2Cache-slow ( $1.82\times$ ) yields a combined  $2.58\times$  speedup.

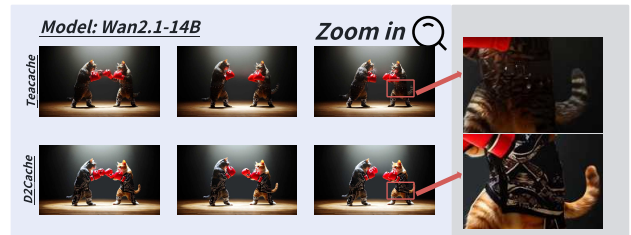

Figure 2. Qualitative comparisons using **Wan2.1-14B** under **superfast** acceleration ( $3.61\times$ ).

D2Cache’s second-order correction generalizes effectively to larger-scale models.

**Compatibility with Sparse VideoGen:** D2Cache is orthogonal to other training-free acceleration methods as they target different computational bottlenecks. We combine *Sparse VideoGen* [1] (SVG,  $1.39\times$ ) with *D2Cache-slow* ( $1.82\times$ ) on Open-Sora 1.2 using an A6000 GPU, achieving a combined  $2.58\times$  speedup. Figure 1 shows qualitative results, confirming that the combined approach preserves visual quality while achieving near-multiplicative acceleration.

### References

- [1] Haocheng Xi, Shuo Yang, Yilong Zhao, Chenfeng Xu, Muiyang Li, Xiuyu Li, Yujun Lin, Han Cai, Jintao Zhang, Dacheng Li, et al. Sparse videogen: Accelerating video diffusion transformers with spatial-temporal sparsity. *arXiv preprint arXiv:2502.01776*, 2025. 1
